# Supplementary material for: High-fidelity carbon dots polarity probes: revealing the heterogeneity of lipids in oncology
Source: Springer Nature journal article supplement (doi:10.1038/s41377-022-00873-x), 2022-06-20
Supplement: MOESM1 [file 41377_2022_873_MOESM1_ESM.pdf]

1     **Supplementary Information for High-fidelity Carbon Dots**  
2     **Polarity Probes: Revealing the Heterogeneity of Lipids in**  
3                     **Oncology**

4     Jingyu Hu<sup>1</sup>, Yuanqiang Sun<sup>1</sup>, Xin Geng<sup>1</sup>, Junli Wang<sup>1</sup>, Yifei Guo<sup>1</sup>, Lingbo Qu<sup>1,2</sup>, Ke Zhang<sup>3</sup> and  
5     Zhaohui Li<sup>1,2,\*</sup>

6  
7     <sup>1</sup>College of Chemistry, Institute of Analytical Chemistry for Life Science, Zhengzhou Key  
8     Laboratory of Functional Nanomaterial and Medical Theranostic, Zhengzhou University,  
9     Zhengzhou, 450001, China.

10    <sup>2</sup>Institute of Chemical Biology and Clinical Application at the First Affiliate Hospital, Zhengzhou  
11    University, Zhengzhou, 450001, China.

12    <sup>3</sup>Department of Chemistry and Chemical Biology, Northeastern University, Boston, MA 02115,  
13    USA.

14    \*Corresponding author. Email: zhaohui.li@zzu.edu.cn

## S1 Materials and Methods

### *Materials:*

2-Nitro-4-aminodiphenylamine, 2-Formylphenylboronic acid pinacol ester (2-FAPE) were purchased from Energy Chemical. HCS LipidTOX™ Deep Red was purchased from Thermo Fisher Scientific. Distilled water was used in all experiments. All used chemicals are of analytical grade and don't need to be purified.

### *Apparatus:*

The FL spectra and UV-vis absorption were obtained from F-4600 spectrophotometer (Hitachi, Japan) and the TU-1810PC spectrophotometer (Beijing, China). The Fourier Transform Infrared (FT-IR) spectrum was obtained from the Bruker Tensor 27 FT-IR spectrophotometer (Bruker, Germany). The transmission electron microscopic (TEM) image was collected from FEI-Tecnai G2 microscopy (USA). And the X-ray photoelectron spectroscopy (XPS, Thermo Germany) was used to obtain the XPS spectrum. Cell images were obtained using the TCS-SP8 confocal microscope (Leica, Germany). Cell viability was obtained by Agilent xCELLigence RTCA DP System (Agilent, America).

### *Endocytosis mechanism study:*

SMMC 7721 cells were cultured at 37 °C for 24 h and then, the cells were pre-treated with 37 °C (control group), 4 °C, and 10 mM NaN<sub>3</sub> for 2 h. After washing three times with PBS solution, the cells were incubated with DMEM containing 50 µg·mL<sup>-1</sup> PS-CDs for 6 min. Then fluorescent images were obtained by using SP-8X Leica laser scanning confocal microscope with the  $\lambda_{ex}$  as 476 nm, where the  $\lambda_{em}$  485–525 nm.

The endocytosis pathway of PS-CDs was studied by endocytosis inhibitors. Four inhibitors were applied to block the endocytic pathway, including chlorpromazine hydrochloride (CPZ), methyl- $\beta$ -cyclodextrin (M $\beta$ CD), Sulfobromophthalein (BSP), and amiloride (AMI). SMMC 7721 cells were pretreated at 37 °C with the cells culture medium containing 5 µg·mL<sup>-1</sup> CPZ (2 h), 5 µg·mL<sup>-1</sup> M $\beta$ CD (2 h), 250 µM BSP (10 min), and 10 µg·mL<sup>-1</sup> AMI (2 h), and then the cells were washed three times with PBS

solution. The cells were incubated with DMEM containing  $50\ \mu\text{g}\cdot\text{mL}^{-1}$  PS-CDs for 6 min and fluorescent images were obtained by using SP-8X Leica laser scanning confocal microscope with the  $\lambda_{ex}$  as 476 nm, where the  $\lambda_{em}$  is 485–525 nm.

*Co-localization experiments:*

SMMC 7721 cells were incubated with the commercial lipid droplets tracker HCS LipidTOX<sup>TM</sup> Deep Red 637/655 (1:1000 dilution) at 37 °C for 30 min and then, the cells were washed three times with PBS solution. Then the cells were incubated with DMEM containing  $50\ \mu\text{g}\cdot\text{mL}^{-1}$  PS-CDs for 6 min and fluorescent images were obtained by using SP-8X Leica laser scanning confocal microscope with the  $\lambda_{ex}$  as 637 and 476 nm, where the  $\lambda_{em}$  is 645–665 and 485–525 nm.

SMMC 7721 cells were incubated with the commercial LysoTrackerTOX<sup>TM</sup> Deep Red 647/668 (50 nM) at 37 °C for 30 min and then, the cells were washed three times with PBS solution. Then the cells were incubated with DMEM containing  $50\ \mu\text{g}\cdot\text{mL}^{-1}$  PS-CDs for 6 min and fluorescent images were obtained by using SP-8X Leica laser scanning confocal microscope with the  $\lambda_{ex}$  as 647 and 476 nm, where the  $\lambda_{em}$  is 658 – 678 and 585 – 625 nm.

SMMC 7721 cells were incubated with the commercial MitoTracker<sup>TM</sup> Deep Red FM 644/665 (100 nM) at 37 °C for 30 min and then, the cells were washed three times with PBS solution. Then the cells were incubated with DMEM containing  $50\ \mu\text{g}\cdot\text{mL}^{-1}$  PS-CDs for 6 min and fluorescent images were obtained by using SP-8X Leica laser scanning confocal microscope with the  $\lambda_{ex}$  as 644 and 476 nm, where the  $\lambda_{em}$  is 655 – 675 and 585 – 625 nm.

SMMC 7721 cells were incubated with the commercial ER-Tracker<sup>TM</sup> Green 504/511 (1  $\mu\text{M}$ ) at 37 °C for 30 min and then, the cells were washed three times with PBS solution. Then the cells were incubated with DMEM containing  $50\ \mu\text{g}\cdot\text{mL}^{-1}$  PS-CDs for 6 min and fluorescent images were obtained by using SP-8X Leica laser scanning confocal microscope with the  $\lambda_{ex}$  as 504 and 476 nm, where the  $\lambda_{em}$  is 510 – 530 and 585 – 625 nm.

72 SMMC 7721 cells were incubated with the commercial Hoechst 33342 (1:1000  
73 dilution) at 37 °C for 30 min and then, the cells were washed three times with PBS  
74 solution. Then the cells were incubated with DMEM containing 50  $\mu\text{g}\cdot\text{mL}^{-1}$  PS-CDs  
75 for 6 min and fluorescent images were obtained by using SP-8X Leica laser scanning  
76 confocal microscope with the  $\lambda_{ex}$  as 405 and 476 nm, where the  $\lambda_{em}$  is 415 – 450 and  
77 585 – 625 nm.

## S2 Supplementary Figures

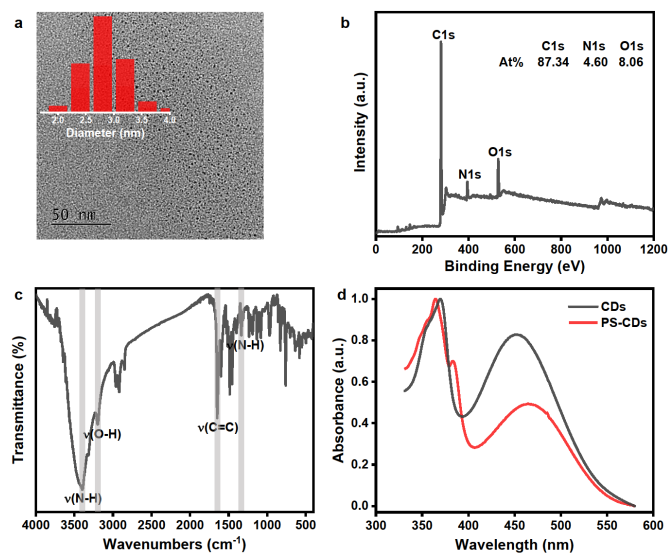

**Figure S1.** (a) TEM image of CDs and the size distribution. (b) XPS spectrum of CDs. (c) FT-IR spectra of CDs. (d) The UV-vis spectra of CDs and PS-CDs.

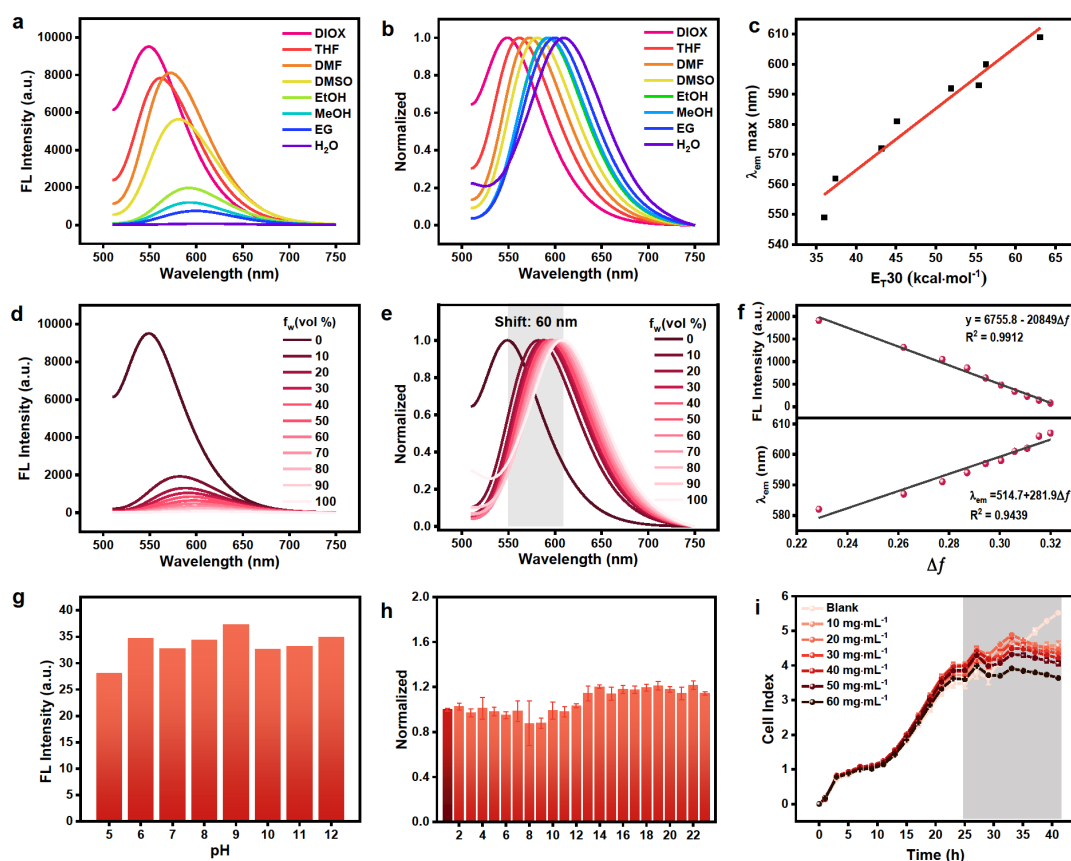

**Figure S2.** (a) Emission spectra of PS-CDs in different solvents. (b) Normalized emission spectra of PS-CDs in different solvents. (c) The linear relationship between the maximum emission wavelength and the solvent's polarity parameter  $E_{\text{T}30}$ . (d) Emission spectra of PS-CDs in different 1,4-dioxane/H<sub>2</sub>O ratios (0% – 100%). (e) Normalized emission spectra of PS-CDs in different DIOX/H<sub>2</sub>O ratios (0% – 100%). (f) Linear relationship between the maximum emission fluorescence intensity, the maximum emission wavelength, and the solvent's  $\Delta f$ . (g) Fluorescence emission spectra of PS-CDs in various Britton-Robinson buffer solution at pH 5 – 12. (h) The fluorescence intensities of Bp-CDs to various analytes (1, PS-CDs 2, K<sup>+</sup> 3, Ca<sup>2+</sup> 4, Na<sup>+</sup> 5, Mg<sup>2+</sup> 6, Al<sup>3+</sup> 7, Zn<sup>2+</sup> 8, Fe<sup>2+</sup> 9, Fe<sup>3+</sup> 10, Cu<sup>2+</sup> 11, Mn<sup>2+</sup> 12, Ag<sup>+</sup> 13, Ser 14, Asn 15, Val 16, Ile 17, His 18, Lys 19, Gln 20, Asp 21, Tyr 22, GSH 23, Cys in PBS (pH = 7.4), the final concentration of each analyte is 100 mM. (i) The cell index of SMMC 7721 in different concentration of PS-CDs at various time.

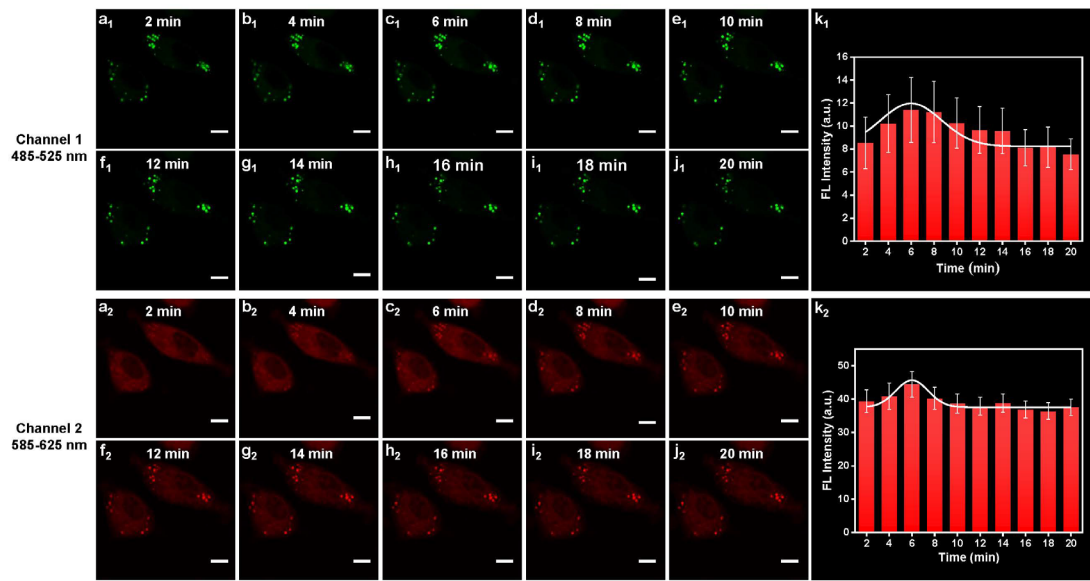

**Figure S3.** The cell imaging of  $50 \mu\text{g}\cdot\text{mL}^{-1}$  PS-CDs for different times. (a<sub>1</sub>) – (j<sub>1</sub>) Confocal fluorescence imaging of SMMC 7721 cells treated with  $50 \mu\text{g}\cdot\text{mL}^{-1}$  PS-CDs at different times. ( $\lambda_{\text{ex}}=476 \text{ nm}$ ,  $\lambda_{\text{em}}=485 - 525 \text{ nm}$ ). (k<sub>1</sub>) The corresponding fluorescence intensities of  $50 \mu\text{g}\cdot\text{mL}^{-1}$  PS-CDs with SMMC 7721 cells for different times. (a<sub>2</sub>) – (j<sub>2</sub>) Confocal fluorescence imaging of SMMC 7721 cells treated with  $50 \mu\text{g}\cdot\text{mL}^{-1}$  PS-CDs at different times. ( $\lambda_{\text{ex}}=476 \text{ nm}$ ,  $\lambda_{\text{em}}=585 - 625 \text{ nm}$ ). (k<sub>2</sub>) The corresponding fluorescence intensities of  $50 \mu\text{g}\cdot\text{mL}^{-1}$  PS-CDs with SMMC 7721 cells for different times. Scale bar:  $10 \mu\text{m}$ .

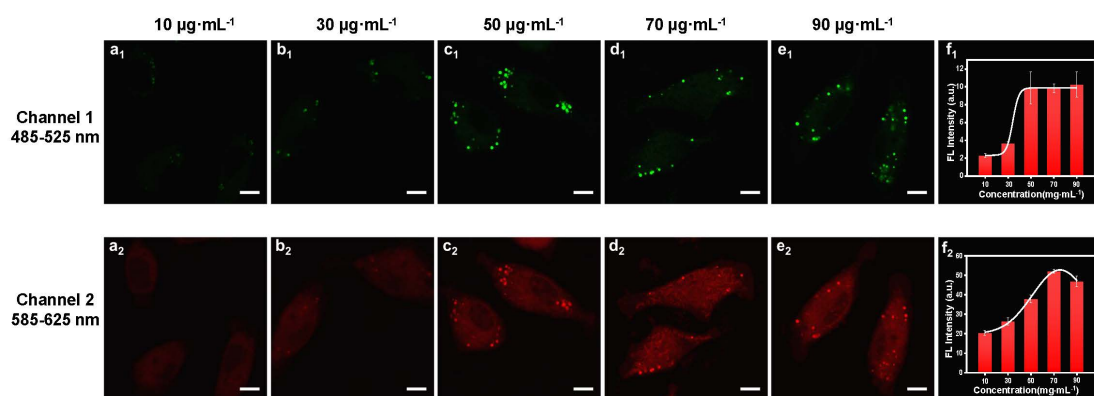

**Figure S4.** The cell imaging of PS-CDs with different concentrations. (a<sub>1</sub>) – (e<sub>1</sub>) Confocal fluorescence imaging of SMMC 7721 cells treated with different concentrations PS-CDs. ( $\lambda_{ex}=476$  nm,  $\lambda_{em}=485 - 525$  nm). (f<sub>1</sub>) The corresponding fluorescence intensities of PS-CDs with SMMC 7721 cells for the different concentrations. (a<sub>2</sub>) – (e<sub>2</sub>) Confocal fluorescence imaging of SMMC 7721 cells treated with different concentrations PS-CDs. ( $\lambda_{ex}=476$  nm,  $\lambda_{em}=585 - 625$  nm). (f<sub>2</sub>) The corresponding fluorescence intensities of PS-CDs with SMMC 7721 cells for the different concentrations. Scale bar: 10  $\mu\text{m}$ .

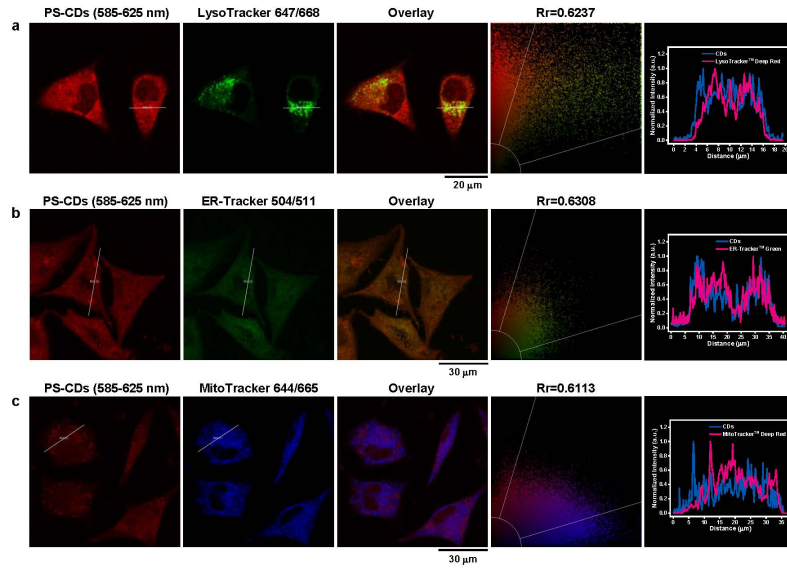

**Figure S5.** Co-localization experiments. (a) Confocal images of SMMC 7721 cells stained with PS-CDs ( $50 \mu\text{g}\cdot\text{mL}^{-1}$ ) and LysoTracker Deep Red (50 nM),  $\lambda_{ex}(\text{PS-CDs})=476 \text{ nm}$ ,  $\lambda_{ex}(\text{LysoTracker})=647 \text{ nm}$ , Scale bar: 20  $\mu\text{m}$ . (b) Confocal images of SMMC 7721 cells stained with PS-CDs ( $50 \mu\text{g}\cdot\text{mL}^{-1}$ ) and ER-Tracker Green (1  $\mu\text{M}$ ),  $\lambda_{ex}(\text{PS-CDs})=476 \text{ nm}$ ,  $\lambda_{ex}(\text{ER-Tracker})=504 \text{ nm}$ , Scale bar: 30  $\mu\text{m}$ . (c) Confocal images of SMMC 7721 cells stained with PS-CDs ( $50 \mu\text{g}\cdot\text{mL}^{-1}$ ) and Mito Tracker Deep Red (100 nM),  $\lambda_{ex}(\text{PS-CDs})=476 \text{ nm}$ ,  $\lambda_{ex}(\text{Mito Tracker})=644 \text{ nm}$ , Scale bar: 30  $\mu\text{m}$ .

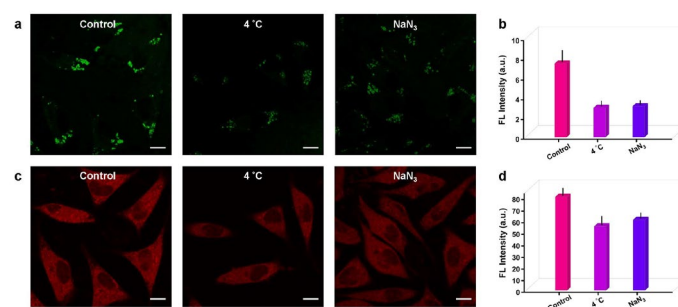

**Figure S6.** The cell imaging of PS-CDs under different conditions. (a) Confocal fluorescent images of living SMMC 7721 cells treated with 50  $\mu\text{g}\cdot\text{mL}^{-1}$  PS-CDs at 37 °C, 4 °C, and  $\text{NaN}_3$  for 2 h.  $\lambda_{\text{ex}}=476$  nm,  $\lambda_{\text{em}}=485 - 525$  nm. (b) The corresponding fluorescence intensities of (a). (c) Confocal fluorescent images of living SMMC 7721 cells treated with 50  $\mu\text{g}\cdot\text{mL}^{-1}$  PS-CDs at 37 °C, 4 °C, and  $\text{NaN}_3$  for 2 h.  $\lambda_{\text{ex}}=476$  nm,  $\lambda_{\text{em}}=585 - 625$  nm. (d) The corresponding fluorescence intensities of (c). Scale bar: 10  $\mu\text{m}$ .

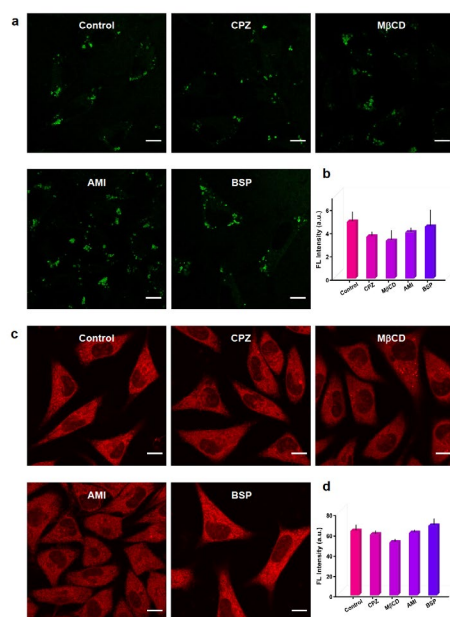

**Figure S7** (a) Effects of endocytosis inhibitors (5  $\mu\text{g}\cdot\text{mL}^{-1}$  CPZ, 5  $\mu\text{g}\cdot\text{mL}^{-1}$  M $\beta$ CD, and 10  $\mu\text{g}\cdot\text{mL}^{-1}$  AMI for 2 h, 250 mM BSP for 10 min) with 50  $\mu\text{g}\cdot\text{mL}^{-1}$  PS-CDs in SMMC 7721 cells were analyzed by confocal microscopy, respectively.  $\lambda_{ex}=476$  nm,  $\lambda_{em}=485 - 525$  nm. (b) The corresponding fluorescence intensities of (a). (c) Effects of endocytosis inhibitors (5  $\mu\text{g}\cdot\text{mL}^{-1}$  CPZ, 5  $\mu\text{g}\cdot\text{mL}^{-1}$  M $\beta$ CD, and 10  $\mu\text{g}\cdot\text{mL}^{-1}$  AMI for 2 h, 250 mM BSP for 10 min) with 50  $\mu\text{g}\cdot\text{mL}^{-1}$  PS-CDs in SMMC 7721 cells were analyzed by confocal microscopy, respectively.  $\lambda_{ex}=476$  nm,  $\lambda_{em}=585 - 625$  nm. (d) The corresponding fluorescence intensities of (c). Scale bar: 10  $\mu\text{m}$ .

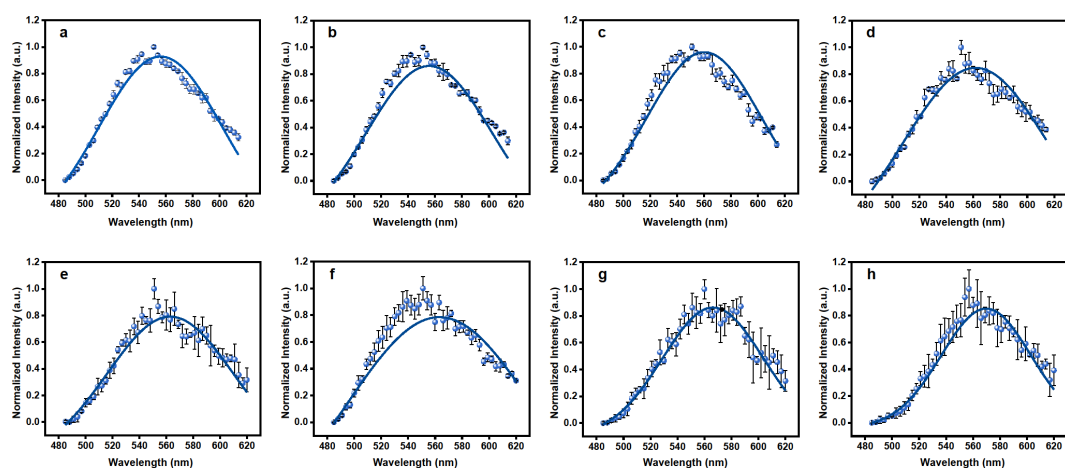

**Figure S8.** *In situ* fluorescence emission spectrum of LDs in live SMMC 7721(a), Huh 7(b), HepG 2(c), HeLa(d), MCF 7(e), 4T1(f), HEK 293(g) and HL 7702(h) cells stained with PS-CDs.  $\lambda_{ex} = 476$  nm.

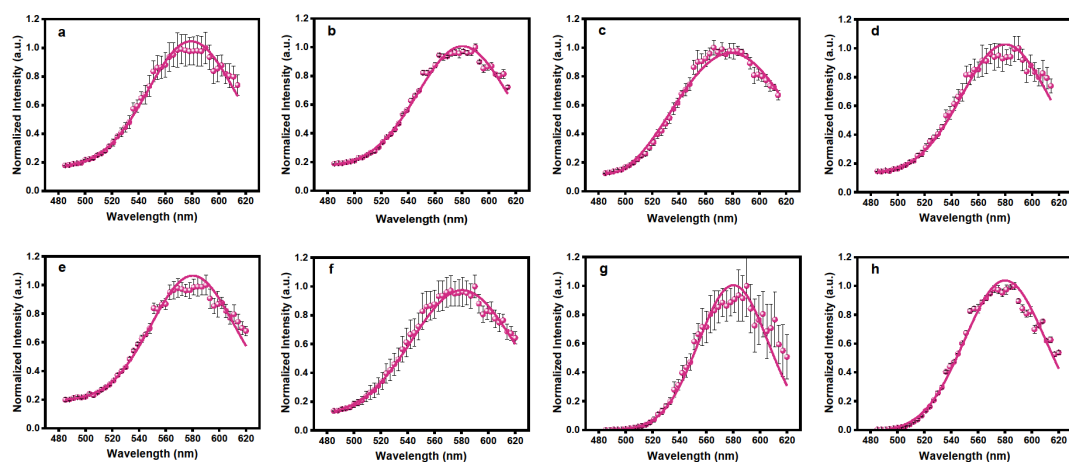

**Figure S9.** *In situ* fluorescence emission spectrum of cytoplasm in live SMMC 7721(a), Huh 7(b), HepG 2(c), HeLa(d), MCF 7(e), 4T1(f), HEK 293(g) and HL 7702(h) cells stained with PS-CDs.  $\lambda_{ex} = 476$  nm.
